# Supplementary material for: Are Chilean Pasture Seed End-Users Adopting New Species? Trends and Joinpoint Regression Analysis of the Last 19 Years of Seed Imports
Source: MDPI journal article supplement (doi:10.3390/agriculture11060552), 2021-06-17
Supplement: s1 [file s1]

## Supplementary file

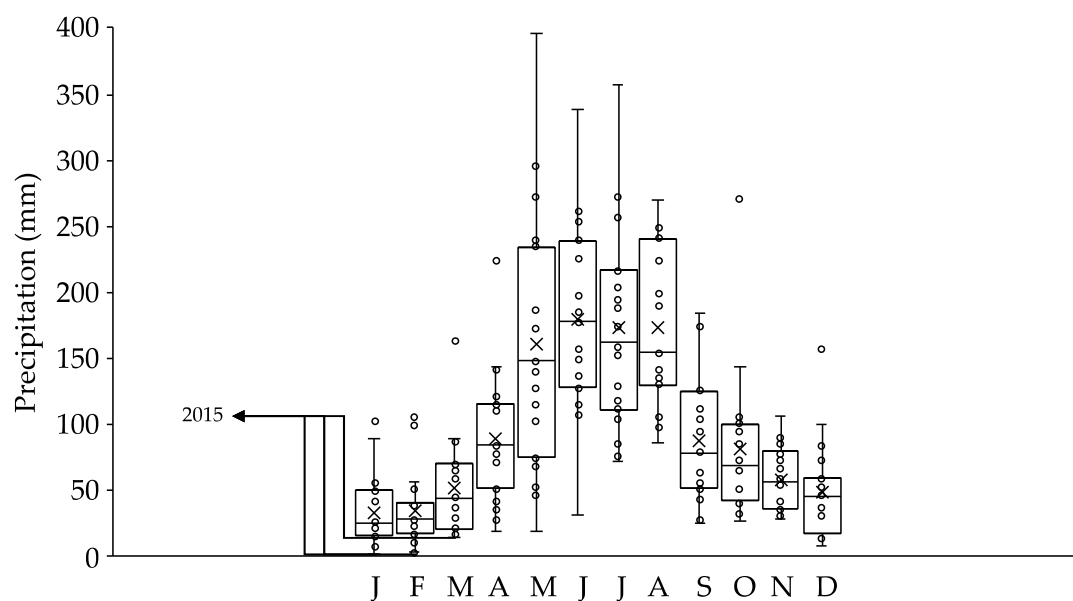

**Figure S1.** Boxplot of monthly precipitation of each month from 2001 to 2019 at INIA Remehue meteorological station (Osorno, Chile). The lines and arrow indicate the precipitation of summer months in the extreme drought event in 2015. The box spans the 25th, and 75th percentiles, the whiskers represent the minimum and maximum values, the line within the box represents the median and the X the mean value.

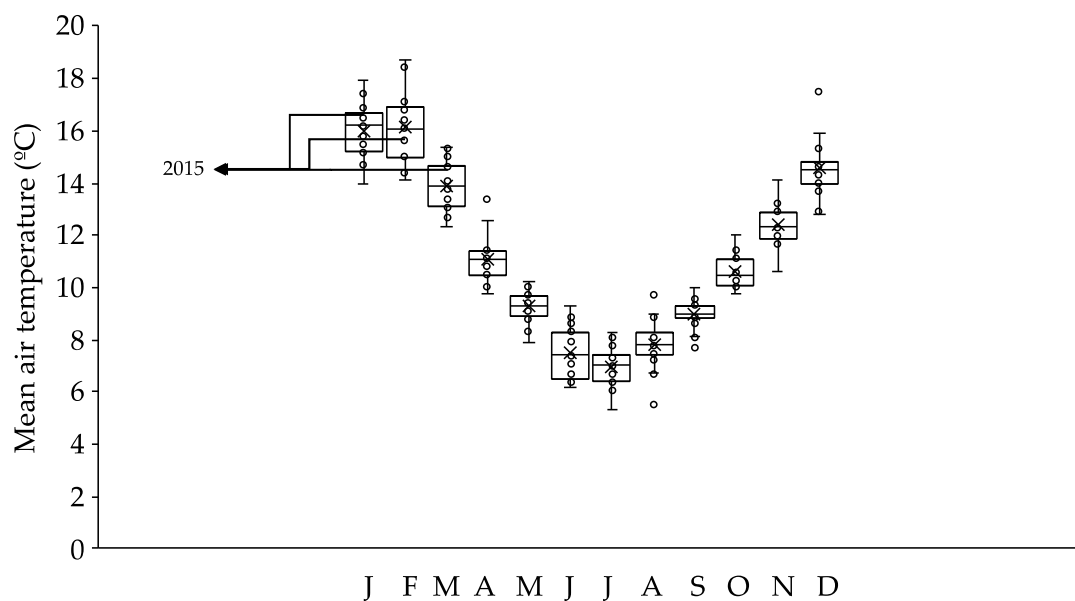

**Figure S2.** Boxplot of monthly mean air temperature of each month from 2001 to 2019 at INIA Remehue meteorological station (Osorno, Chile). The lines and arrow indicate the mean air temperature of summer months in the extreme drought event in 2015. The box spans the 25th, and 75th percentiles, the whiskers represent the minimum and maximum values, the line within the box represents the median and the X the mean value.

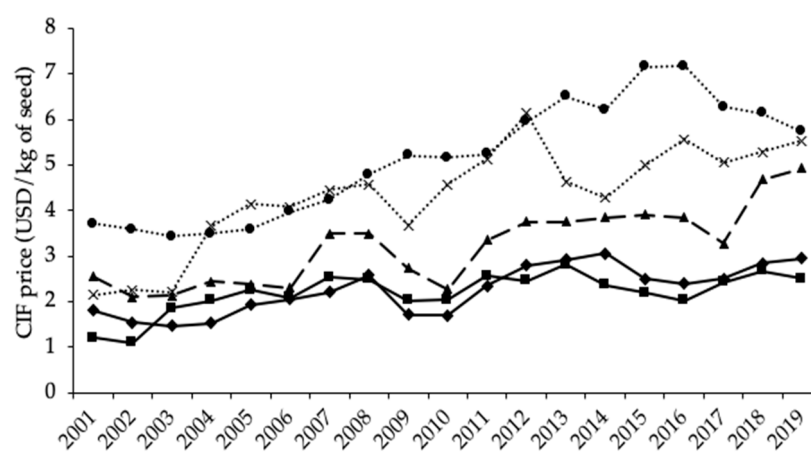

**Figure S3.** Pastures and related turfgrass import CIF prices (nominal values, USD/kg of seed) by group for *Lolium* spp. (■), *Festuca* spp. (◆), *Trifolium* spp. (·x·), *Medicago* spp. (·●·) and Other pastures (-▲-).
